# Supplementary material for: Human Health Effects of Tetrachloroethylene: Key Findings and Scientific Issues
Source: PubMed Central journal article supplement (PMC3984230; doi:10.1289/ehp.1307359), 2014-02-14
Supplement: ehp.1307359.s001.pdf [file ehp.1307359.s001.pdf]

## **Supplemental Material**

### **Human Health Effects of Tetrachloroethylene: Key Findings and Scientific Issues**

Kathryn Z. Guyton, Karen A. Hogan, Cheryl Siegel Scott, Glinda S. Cooper, Ambuja S. Bale, Leonid Kopylev, Stanley Barone Jr., Susan L. Makris, Barbara Glenn, Ravi P. Subramaniam, Maureen R. Gwinn, Rebecca C. Dzubow, and Weihseh A. Chiu

| <b>Table of Contents</b>                                                      | <b>Page</b> |
|-------------------------------------------------------------------------------|-------------|
| <b>Table S1.</b> Tumor incidence in adult rats exposed to tetrachloroethylene | <b>2</b>    |
| <b>Table S2.</b> Tumor incidence in adult mice exposed to tetrachloroethylene | <b>3</b>    |
| <b>References</b>                                                             | <b>4</b>    |

**Table S1.** Tumor incidence in adult rats exposed to tetrachloroethylene.

| Bioassay                                                          | Sex     | Administered Exposure | Mononuclear cell leukemia <sup>a</sup> | Kidney adenoma or carcinoma | Testis interstitial cell tumor | Brain glioma          |
|-------------------------------------------------------------------|---------|-----------------------|----------------------------------------|-----------------------------|--------------------------------|-----------------------|
| NTP (1986) F344/N rats;<br>inhalation: 6 h/d, 5 d/wk, 104 wk      | Males   | 0                     | 28/50 <sup>b</sup> (56) <sup>c</sup>   | 1/49 (2) <sup>c</sup>       | 35/50 (70) <sup>c</sup>        | 1/50 (2) <sup>c</sup> |
|                                                                   |         | 200 ppm               | 37/48 (77)                             | 3/47 (6)                    | 39/47 (83)                     | 0/48 (0)              |
|                                                                   |         | 400 ppm               | 37/50 (74)                             | 4/50 (8)                    | 41/50 (82)                     | 4/50 (8)              |
|                                                                   | Females | 0                     | 18/50 (36) <sup>c</sup>                | 0/50 (0)                    | N/A                            | 1/50 (2)              |
|                                                                   |         | 200 ppm               | 30/50 (60)                             | 0/49 (0)                    |                                | 0/50 (0)              |
|                                                                   |         | 400 ppm               | 29/50 (58)                             | 0/50 (0)                    |                                | 2/50 (4)              |
| JISA (1993) F344/DuCrj rats;<br>inhalation: 6 h/d, 5 d/wk, 104 wk | Males   | 0                     | 11/50 (22) <sup>c</sup>                | 1/50 (2)                    | 47/50 (94)                     | 2/50 (4)              |
|                                                                   |         | 50 ppm                | 14/50 (28)                             | 2/50 (4)                    | 46/50 (92)                     | 0/50 (0)              |
|                                                                   |         | 200 ppm               | 22/50 (44)                             | 1/50 (2)                    | 45/50 (90)                     | 0/50 (0)              |
|                                                                   |         | 600 ppm               | 27/50 (54)                             | 2/50 (4)                    | 48/50 (96)                     | 0/50 (0)              |
|                                                                   | Females | 0                     | 10/50 (20) <sup>c</sup>                | 1/50 (2)                    | N/A                            | 0/50 (0)              |
|                                                                   |         | 50 ppm                | 17/50 (34)                             | 0/50 (0)                    |                                | 0/50 (0)              |
|                                                                   |         | 200 ppm               | 16/50 (32)                             | 0/50 (0)                    |                                | 1/50 (2)              |
|                                                                   |         | 600 ppm               | 19/50 (38)                             | 1/50 (2)                    |                                | 0/50 (0)              |

<sup>a</sup>Reflects the number of animals with MCL reported under “multiple organs,” spleen, or liver. <sup>b</sup>Fractions represent survival-adjusted incidences. <sup>c</sup> $p \leq 0.05$ : Poly-3 trend test (Portier and Bailer, 1989; Bailer and Piegorsch, 1997).

**Table S2.** Tumor incidence in adult mice exposed to tetrachloroethylene.

| Bioassay                                                                | Sex     | Administered exposure                                                      | Total oxidative metabolism, liver <sup>a</sup> | Hepatocellular adenomas or carcinomas | Hemangiomas or hemangio-sarcomas <sup>b</sup> |                        |                       |
|-------------------------------------------------------------------------|---------|----------------------------------------------------------------------------|------------------------------------------------|---------------------------------------|-----------------------------------------------|------------------------|-----------------------|
| NCI (1977) <sup>c</sup> B6C3F <sub>1</sub> mice<br>Gavage: 5d/wk, 78 wk | Males   | Vehicle                                                                    | 0                                              | 2/18(11) <sup>d</sup>                 | None reported <sup>e</sup>                    |                        |                       |
|                                                                         |         | 536 mg/kg-day                                                              | 35.3                                           | 32/47 (67)                            |                                               |                        |                       |
|                                                                         |         | 1,072 mg/kg-day                                                            | 67.4                                           | 27/44 (60)                            |                                               |                        |                       |
|                                                                         | Females | Vehicle                                                                    | 0                                              | 0/20 (0) <sup>c</sup>                 | None reported                                 |                        |                       |
|                                                                         |         | 386 mg/kg-day                                                              | 23.7                                           | 19/48 (40)                            |                                               |                        |                       |
|                                                                         |         | 772 mg/kg-day                                                              | 46.0                                           | 19/48 (40)                            |                                               |                        |                       |
| NTP (1986) B6C3F <sub>1</sub> mice<br>Inhalation: 6 h/d, 5 d/wk, 104 wk | Males   | 0 ppm                                                                      | 0                                              | 17/49 (35) <sup>c</sup>               | 1/49 (2)                                      |                        |                       |
|                                                                         |         | 100 ppm                                                                    | 13.2                                           | 31/47 (66)                            | 0/49 (0)                                      |                        |                       |
|                                                                         |         | 200 ppm                                                                    | 26.0                                           | 41/50 (82)                            | 0/50 (0)                                      |                        |                       |
|                                                                         |         | Females                                                                    | 0 ppm                                          | 0                                     | 4/45 (9) <sup>c</sup>                         | 0/48 (0)               |                       |
|                                                                         | Females | 100 ppm                                                                    | 12.8                                           | 17/42 (40)                            | 3/50 (6)                                      |                        |                       |
|                                                                         |         | 200 ppm                                                                    | 25.3                                           | 38/48 (76)                            | 0/50 (0)                                      |                        |                       |
|                                                                         |         | JISA (1993) Crj:BDF <sub>1</sub> mice<br>Inhalation: 6 h/d, 5 d/wk, 104 wk | Males                                          | 0 ppm                                 | 0                                             | 13/46(28) <sup>c</sup> | 1/46 (2) <sup>c</sup> |
|                                                                         |         |                                                                            |                                                | 10 ppm                                | 2.3                                           | 21/49 (43)             | 1/49 (2)              |
| 50 ppm                                                                  | 8.3     |                                                                            |                                                | 19/48 (40)                            | 5/48 (10)                                     |                        |                       |
| 250 ppm                                                                 | 33.6    |                                                                            |                                                | 40/49 (82)                            | 5/49 (10)                                     |                        |                       |
| Females                                                                 | Females | 0 ppm                                                                      | 0                                              | 3/50 (6) <sup>c</sup>                 | 1/50 (2)                                      |                        |                       |
|                                                                         |         | 10 ppm                                                                     | 2.1                                            | 3/47 (6)                              | 0/47 (0)                                      |                        |                       |
|                                                                         |         | 50 ppm                                                                     | 7.8                                            | 7/48 (15)                             | 2/49 (4)                                      |                        |                       |
|                                                                         |         | 250 ppm                                                                    | 31.6                                           | 33/49 (67)                            | 3/50 (6)                                      |                        |                       |

<sup>a</sup>In mg/kg<sup>3/4</sup>-day. <sup>b</sup>Reported as hemangioendotheliomas by JISA (1993). The term has been updated to hemangioma (benign) or hemangiosarcoma (malignant). <sup>c</sup>Initial gavage doses of 450 or 900 mg/kg-day (males) and 300 or 600 mg/kg-day (females) were adjusted several times during the course of the study; listed exposures are TWA daily doses through Week 78. Surviving animals were observed up to study termination in Week 90.

<sup>d</sup>p < 0.05: Cochran-Armitage test for trend (NCI), Life atable test (NTP, JISA). <sup>e</sup>None reported: Individual animal data were not available, and summary data were not reported for this tumor type.

## References

- JISA (Japan Industrial Safety and Health Association). 1993. Carcinogenicity study of tetrachloroethylene by inhalation in rats and mice. Hadano, Japan. Available at: <http://www.epa.gov/iris/supdocs/0106index.html>
- NCI (National Cancer Institute). 1977. Bioassay of tetrachloroethylene for possible carcinogenicity. NCI-CGTR-13; DHEW Publication No. (NIH) 77-813. Bethesda, MD:National Institutes of Health.
- NTP (National Toxicology Program). 1986. Toxicology and carcinogenesis studies of tetrachloroethylene (perchloroethylene) (CAS no. 127-18-4) in F344/N rats and B6C3F1 mice (inhalation studies). NTP TR 311. Research Triangle Park, NC:U.S. Department of Health and Human Services, National Toxicology Program.
- Piegorsch WW, Bailer AJ. 1997. Statistics for Environmental Biology and Toxicology. London: Chapman and Hall.
- Portier CJ, Bailer AJ. 1989. Testing for increased carcinogenicity using a survival-adjusted quantal response test. *Fundam Appl Toxicol.* 12(4):731-7.
